# Supplementary material
Source: PubMed Central journal article supplement (PMC5792292)
Supplement: 2017_177857-Disclosures_and_Contributions.pdf [file 2017_177857-Disclosures_and_Contributions.pdf]

Haematologica  
HAEMATOL/2017/177857  
Version 4

Worldwide study of hematopoietic allogeneic stem cell transplantation  
in pyruvate kinase deficiency

Stephanie van Straaten, Marc Bierings, Paola Bianchi, Kensuke Akiyoshi, Hitoshi Kanno, Isabel Badell Serra, Jing Chen, Xiaohang Huang, Eduard van Beers, Supachai Ekwattanakit, Tayfun Güngör, Wijnanda Adriana Kors, Frans Smiers, Reinier Raymakers, Lucrecia Yanez, Julian Sevilla, Wouter van Solinge, Jose Carlos Segovia, and Richard Van Wijk

Disclosures: SS received partial research funding from e-ENERCA. JCS was supported by the following grants: Fondo de Investigaciones Sanitarias, Instituto de Salud Carlos III (RETICS-RD16/0011/0011), co-finance by FEDER programme, and MINECO (SAF2014-54885-R. The content of this manuscript was conceived, prepared, and written by the authors alone, independent of any other commercial entity.

Contributions: All authors retrieved, evaluated and interpreted the data. SS, MB, RW, PB and JCS wrote the first draft of the manuscript. The second draft was revised and approved by all authors.
